# Supplementary material for: Comparative Proteomic Analysis of Proteins in Breast Milk during Different Lactation Periods
Source: MDPI journal article supplement (doi:10.3390/nu14173648), 2022-09-03
Supplement: s1 [file s1]

**Table S1.** Information of participants

| <b>Mother</b> | <b>Age<br/>(Years)</b> | <b>Height<br/>(cm)</b> | <b>Weight<br/>(kg)</b> | <b>Parity</b> | <b>Gender of Baby</b> | <b>Birth Weight<br/>(g)</b> | <b>Birth Mode: Vaginal Delivery (V) or Cesarean Section (C)</b> |
|---------------|------------------------|------------------------|------------------------|---------------|-----------------------|-----------------------------|-----------------------------------------------------------------|
| Mother1       | 34                     | 164                    | 72                     | 1             | female                | 3550                        | V                                                               |
| Mother2       | 23                     | 169                    | 67                     | 1             | male                  | 3800                        | C                                                               |
| Mother3       | 26                     | 160                    | 57                     | 1             | male                  | 3300                        | V                                                               |
| Mother4       | 30                     | 164                    | 70                     | 1             | female                | 4300                        | C                                                               |
| Mother5       | 32                     | 153                    | 49                     | 1             | female                | 2500                        | V                                                               |
| Mother6       | 29                     | 160                    | 52                     | 1             | female                | 3500                        | C                                                               |
| Mother7       | 32                     | 158                    | 62                     | 1             | female                | 2950                        | V                                                               |
| Mother8       | 26                     | 158                    | 55                     | 1             | female                | 2350                        | V                                                               |
| Mother9       | 31                     | 166                    | 65                     | 1             | female                | 2900                        | V                                                               |
| Mother10      | 30                     | 170                    | 75                     | 1             | female                | 3450                        | V                                                               |
| Mother11      | 25                     | 156                    | 50                     | 1             | male                  | 2650                        | V                                                               |
| Mother12      | 25                     | 158                    | 52                     | 1             | female                | 3050                        | C                                                               |
| Mother13      | 25                     | 162                    | 69                     | 1             | female                | 4200                        | C                                                               |
| Mother14      | 25                     | 158                    | 50                     | 2             | female                | 3500                        | V                                                               |
| Mother15      | 25                     | 165                    | 69                     | 1             | female                | 3850                        | V                                                               |
| Mother16      | 28                     | 162                    | 70                     | 1             | female                | 3200                        | V                                                               |
| Mother17      | 26                     | 164                    | 58                     | 1             | female                | 2800                        | V                                                               |
| Mother18      | 24                     | 160                    | 80                     | 1             | male                  | 3100                        | V                                                               |
